# Supplementary material for: K4TM4(V2O7)2(IO3)4(H2O) (TM = Zn, Ni, Co): a series of quinary mixed metal–vanadium(v)–iodates
Source: Royal Society of Chemistry journal article supplement (doi:10.1039/c3ce41653d), 2013-01-01
Supplement: c3ce41653d.pdf [file c3ce41653d.pdf]

# **$K_4TM_4(V_2O_7)_2(IO_3)_4(H_2O)$ (TM = Zn, Ni, Co): A Series of Quinary Mixed Metal Vanadium(V) Iodates**

*Bing-Ping Yang, Xiang Xu, Chao Huang and Jiang-Gao Mao\**

## **Supporting Information**

Figure S1. X-ray diffraction powder patterns for  $K_4TM_4(V_2O_7)_2(IO_3)_4(H_2O)$  (TM = Zn, Ni, Co): Simulated, experimental and after thermal treatment at 350 °C for 2 hrs.

Figure S2. Powder X-ray diffraction studies for the thermal decomposition products of  $K_4TM_4(V_2O_7)_2(IO_3)_4(H_2O)$  (TM = Zn, Ni, Co) (800 °C, 2 hrs).

Figure S3. Infrared Vibrations ( $cm^{-1}$ ) for  $K_4TM_4(V_2O_7)_2(IO_3)_4(H_2O)$  (TM = Zn, Ni, Co).

Figure S4. UV absorption spectra for  $K_4TM_4(V_2O_7)_2(IO_3)_4(H_2O)$  (TM = Zn, Ni, Co).

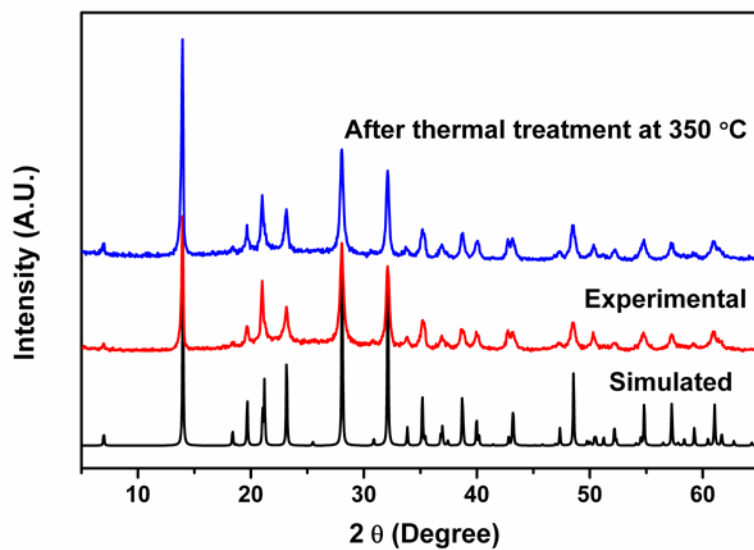

(a)  $K_4Zn_4(V_2O_7)_2(IO_3)_4(H_2O)$

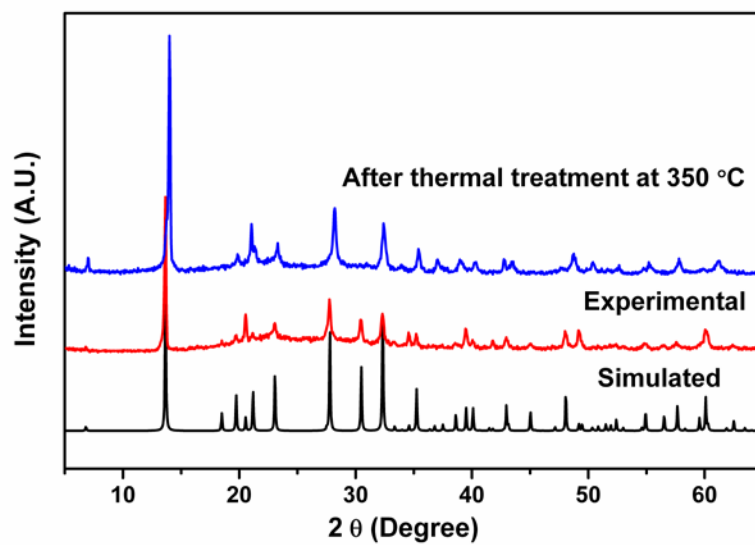

(b)  $K_4Ni_4(V_2O_7)_2(IO_3)_4(H_2O)$

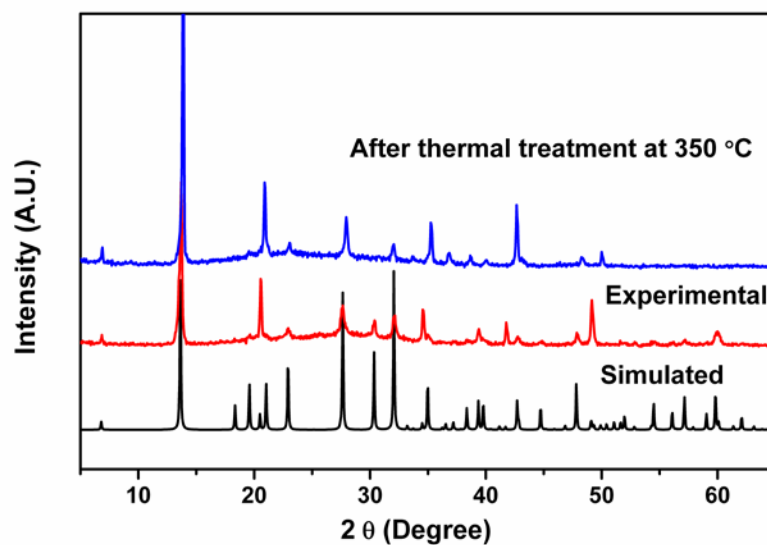

(c)  $\text{K}_4\text{Co}_4(\text{V}_2\text{O}_7)_2(\text{IO}_3)_4(\text{H}_2\text{O})$

Figure S1. X-ray diffraction powder patterns for  $\text{K}_4\text{TM}_4(\text{V}_2\text{O}_7)_2(\text{IO}_3)_4(\text{H}_2\text{O})$  (TM = Zn, Ni, Co): Simulated, experimental and after thermal treatment at 350 °C for 2 hrs.

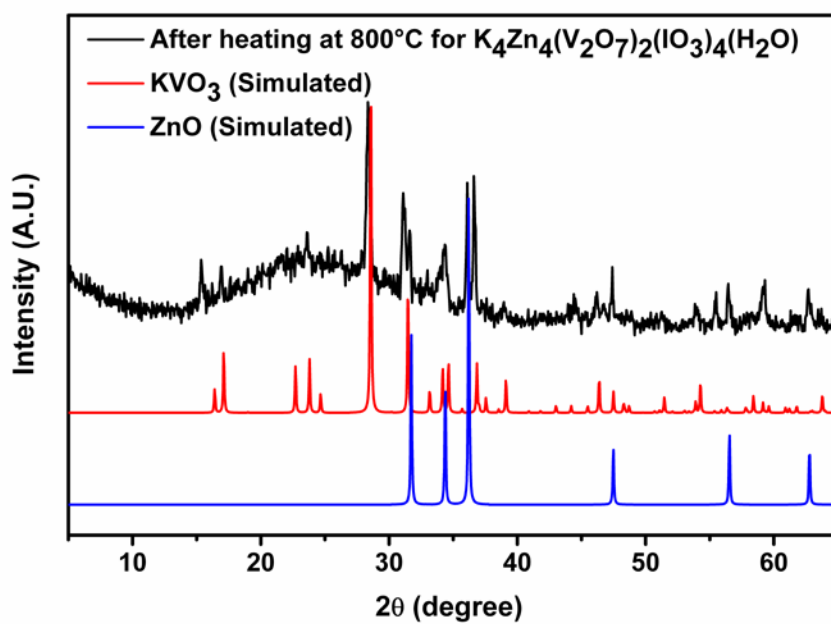

(a)

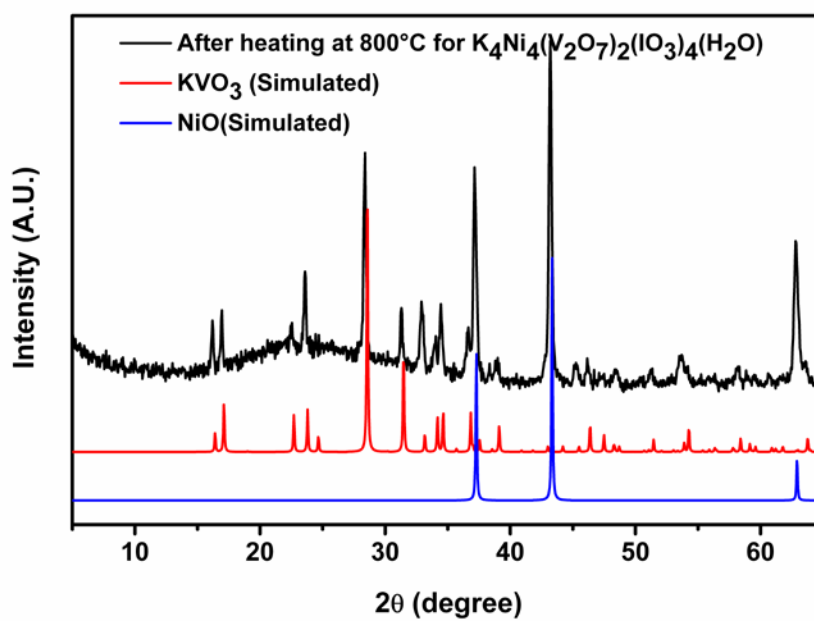

(b)

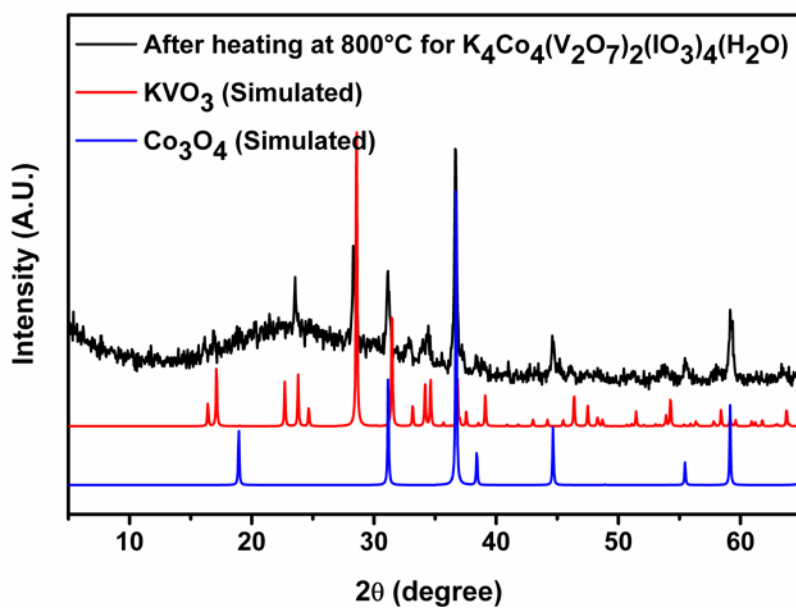

(c)

Figure S2. Powder X-ray diffraction studies for the thermal decomposition products of  $K_4TM_4(V_2O_7)_2(IO_3)_4(H_2O)$  (TM = Zn (a), Ni (b), Co (c)) (800 °C, 2 hrs).

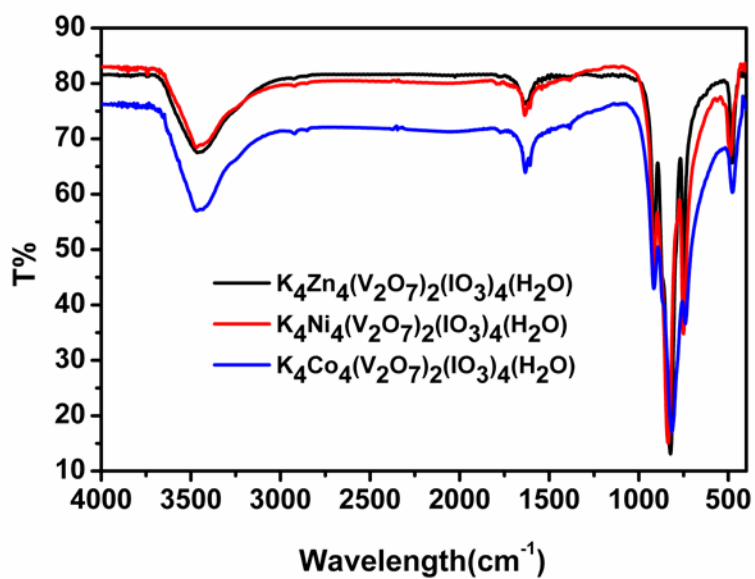

Figure S3. Infrared Vibrations ( $cm^{-1}$ ) for  $K_4TM_4(V_2O_7)_2(IO_3)_4(H_2O)$  (TM = Zn, Ni, Co).

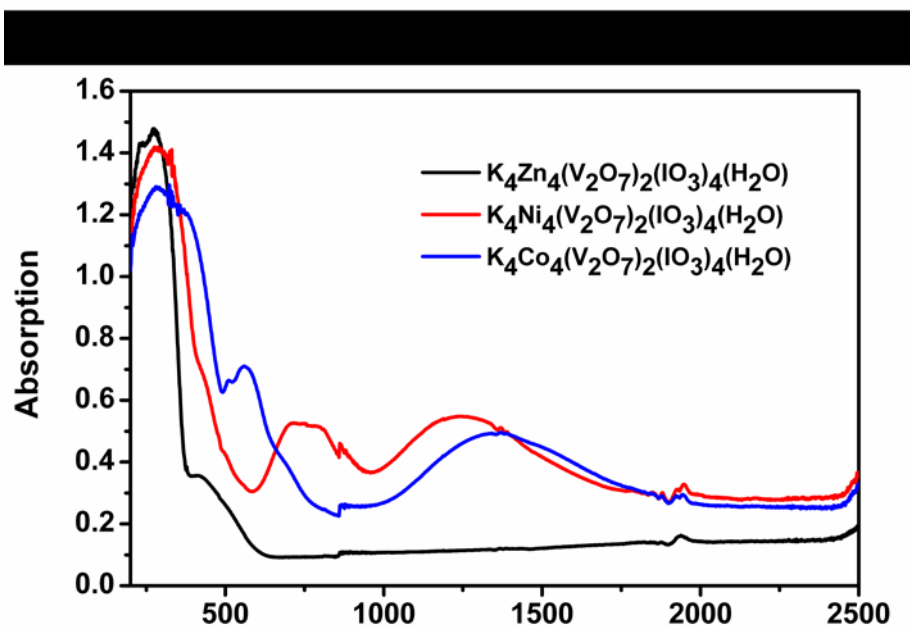

Figure S4. UV absorption spectra for  $K_4TM_4(V_2O_7)_2(IO_3)_4(H_2O)$  (TM = Zn, Ni, Co).
